# Supplementary material
Source: MDPI journal article supplement (https://www.mdpi.com/2079-6412/11/5/597)
Supplement: s1 [file s1]

# Supplementary Materials: Microstructure and Corrosion Behavior of Ti-Nb Coatings on NiTi Substrate Fabricated by Laser Cladding

Jie Hu <sup>1</sup>, Yaojia Ren <sup>1</sup>, Qianli Huang <sup>1</sup>, Hao He <sup>2,\*</sup>, Luxin Liang <sup>1</sup>, Jingbo Liu <sup>1</sup>, Ruidi Li <sup>1</sup> and Hong Wu <sup>1,\*</sup>

<sup>1</sup> State Key Laboratory of Powder Metallurgy, Central South University, Changsha 410083, China; jiehuu@csu.edu.cn (J.H.); 125ren@163.com (Y.R.); hql1990@163.com (Q.H.); Liang\_luxin@163.com (L.L.); jingbo-liu@csu.edu.cn (J.L.); liruidi@csu.edu.cn (R.L.)

<sup>2</sup> Department of Vascular Surgery, Second Xiangya Hospital, Central South University, Changsha 410011, China

\* Correspondence: jimmyhehao@gmail.com (H.H.); hwucsu@csu.edu.cn (H.W.)

**Table S1.** Ion concentrations in SBF solution.

| Ion                            | Ion Concentrations (mM) |
|--------------------------------|-------------------------|
| Na <sup>+</sup>                | 142.0                   |
| K <sup>+</sup>                 | 5.0                     |
| Mg <sup>2+</sup>               | 1.5                     |
| Ca <sup>2+</sup>               | 2.5                     |
| Cl <sup>-</sup>                | 147.8                   |
| HCO <sub>3</sub> <sup>-</sup>  | 4.2                     |
| HPO <sub>4</sub> <sup>2-</sup> | 1.0                     |
| SO <sub>4</sub> <sup>2-</sup>  | 0.5                     |
